# Supplementary material for: Optimization of Resolving Power, Fragmentation, and Mass Calibration in an Orbitrap Spectrometer for Analysis of 24 Pesticide Metabolites in Urine
Source: Hindawi journal article supplement (doi:10.1155/2019/1917369), 2019-04-17
Supplement: f1 [file 1917369.f1.pdf]

## **Supplementary material**

### **Optimization of Resolving Power, fragmentation and mass calibration in an Orbitrap Spectrometer for analysis of 24 pesticide metabolites in urine**

**Authors:** Pablo Dualde <sup>a, b</sup>, Clara Coscollà <sup>a, c</sup>, Agustín Pastor <sup>b</sup> and Vicent Yusà\* <sup>a, b, c</sup>

<sup>a</sup> Foundation for the Promotion of Health and Biomedical Research in the Valencian Region, FISABIO-Public Health, 21, Avenida Catalunya, 46020, Valencia, Spain;

<sup>b</sup> Analytical Chemistry Department, University of Valencia, Edifici Jeroni Muñoz, Dr. Moliner 50, 46100 Burjassot, Spain;

<sup>c</sup> Public Health Laboratory of Valencia, 21, Avenida Catalunya, 46020 Valencia, Spain.

#### **Table of Contents**

| Type        | Captions                                                                                                                                           | Page |
|-------------|----------------------------------------------------------------------------------------------------------------------------------------------------|------|
| Table SI.1  | Scheme of the Resolving power optimization study                                                                                                   | 1    |
| Figure SI.1 | Number of ions with high ([100-80]%) and low (<80%) peak areas at R=10,000, R=25,000 and R=50,000 (FWHM), for total, diagnostic and fragment ions. | 2    |

**Table SI.1. Scheme of the Resolving power optimization study**

| Ionization mode                                                                 | ESI NEG |        |        | ESI POS |        |        |
|---------------------------------------------------------------------------------|---------|--------|--------|---------|--------|--------|
| Resolving power (FWHM)                                                          | 10,000  | 25,000 | 50,000 | 10,000  | 25,000 | 50,000 |
| N° aliquotes (spiked urine) injected <sup>a</sup>                               | 6       | 6      | 6      | 6       | 6      | 6      |
| N° acquisitions non-applying fragmentation <sup>a</sup> (diagnostic ions)       | 6       | 6      | 6      | 6       | 6      | 6      |
| N° acquisitions applying fragmentation (HCD 20 eV) <sup>a</sup> (fragment ions) | 6       | 6      | 6      | 6       | 6      | 6      |

<sup>a</sup>Each injection allowed both “applying fragmentation” and “non-applying fragmentation” acquisitions quasi-simultaneously

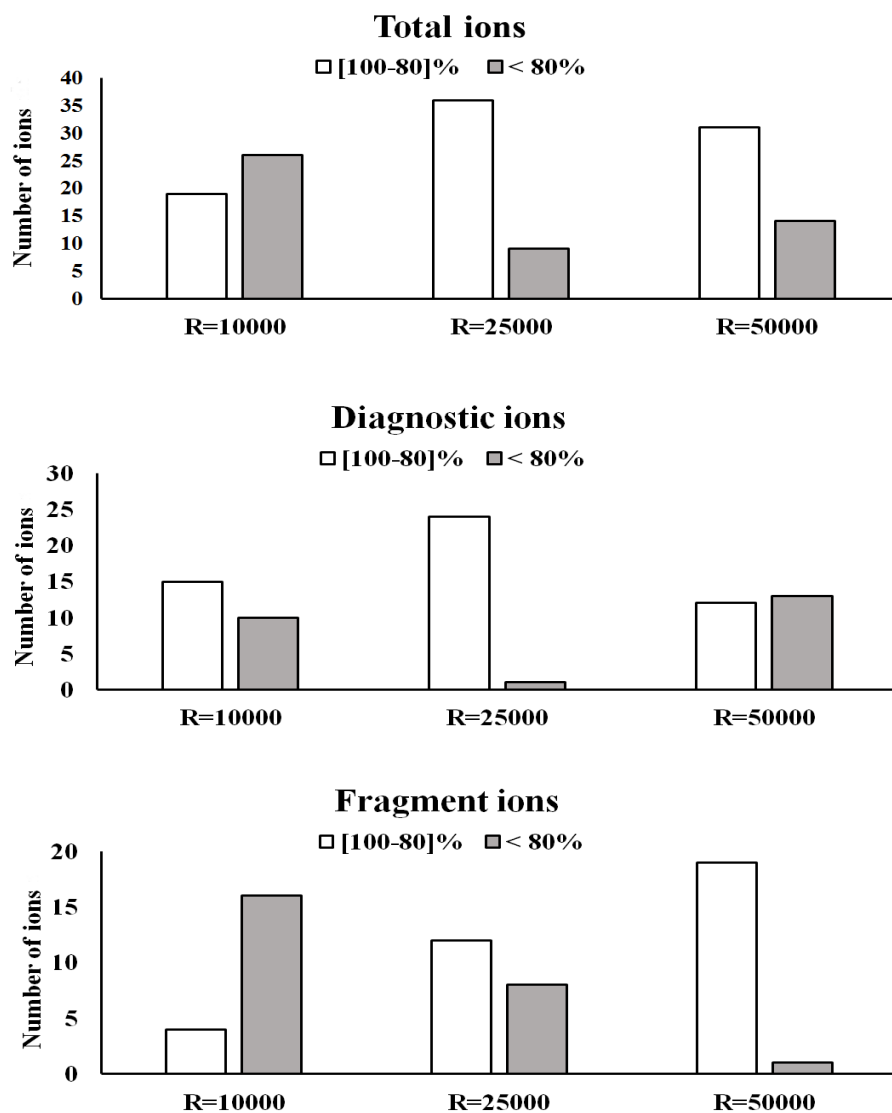

**Figure SL1.** Number of ions with high ([100-80]%) and low (<80%) peak areas at R=10,000, R=25,000 and R=50,000 (FWHM), for total, diagnostic and fragment ions. The percentage (%) is calculated dividing the area of an ion by the highest area obtained for that ion and multiplying by 100.
